# Supplementary material for: Attention! A good bedside test for delirium?
Source: PubMed Central journal article supplement — J Neurol Neurosurg Psychiatry. 2014 Feb 25;85(10):1122–31. doi: 10.1136/jnnp-2013-307053 (PMC4173985; doi:10.1136/jnnp-2013-307053), 2014-02-25

## Supplementary Figures:

SF1: Tests which performed best in older patients: i) sensitivity; ii) specificity

i)

Older patients, best tests (sensitivity), n=133

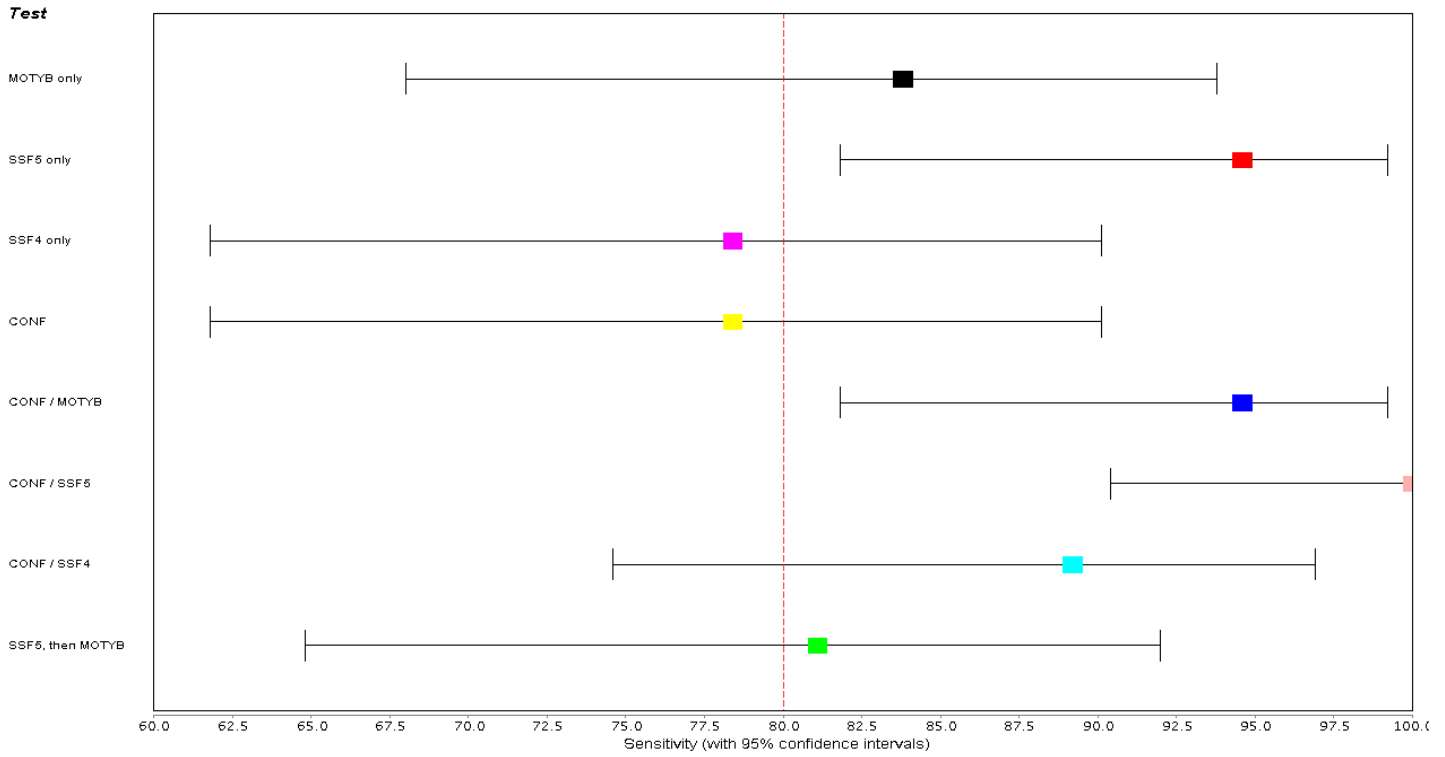

ii)

Older patients, best tests (specificity), n=133

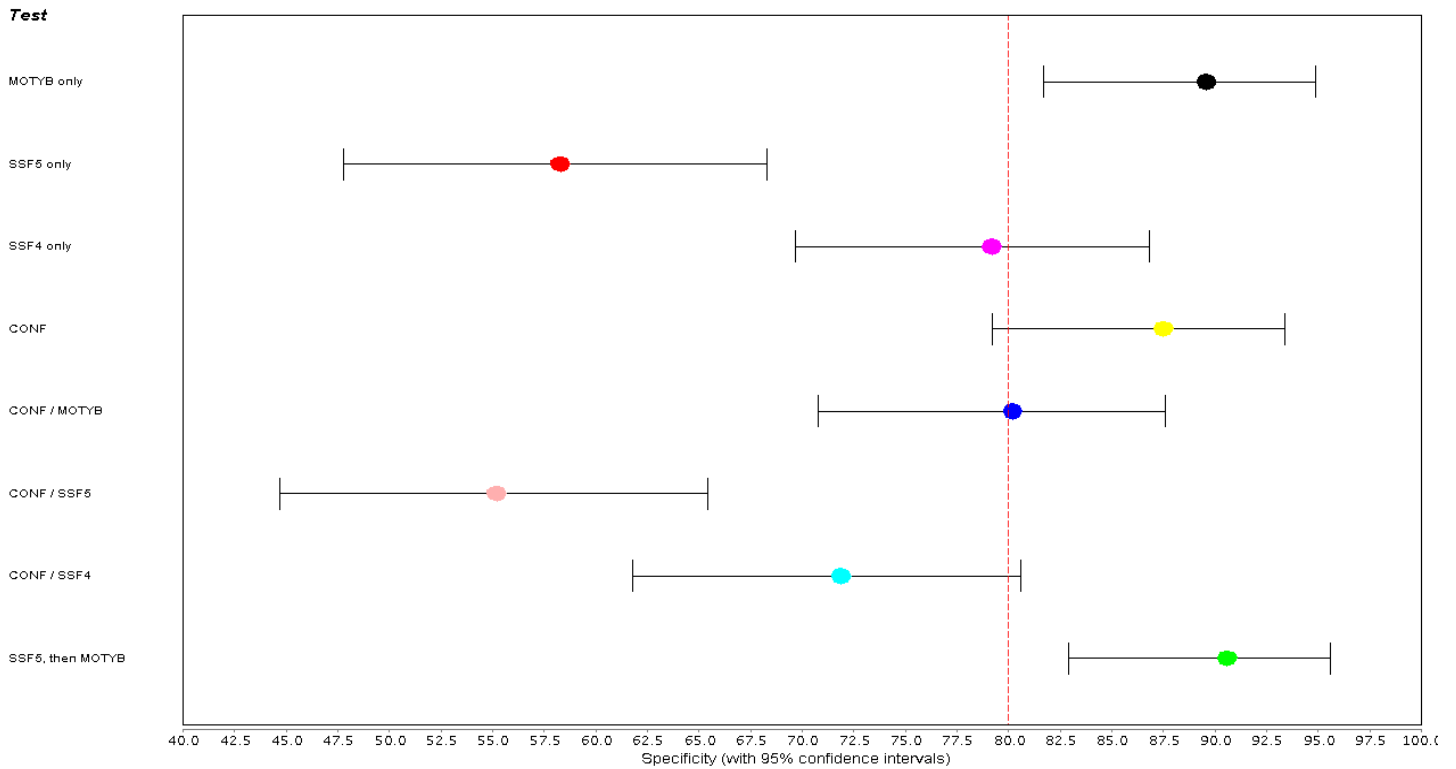

SF2: Tests which performed best in younger patients: i) sensitivity; ii) specificity

i)

Younger patients, best tests (sensitivity), n=132

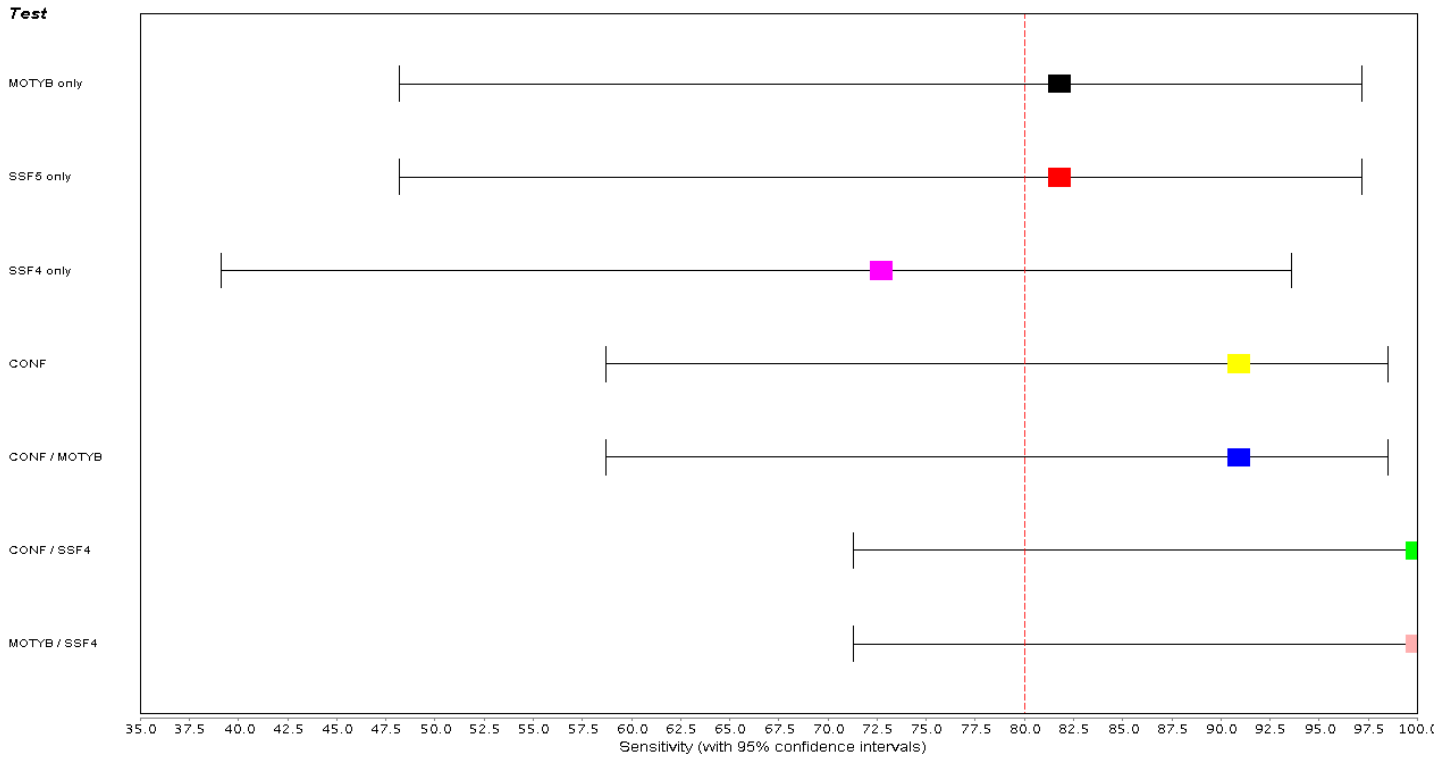

ii)

Younger patients, best tests (specificity), n=132

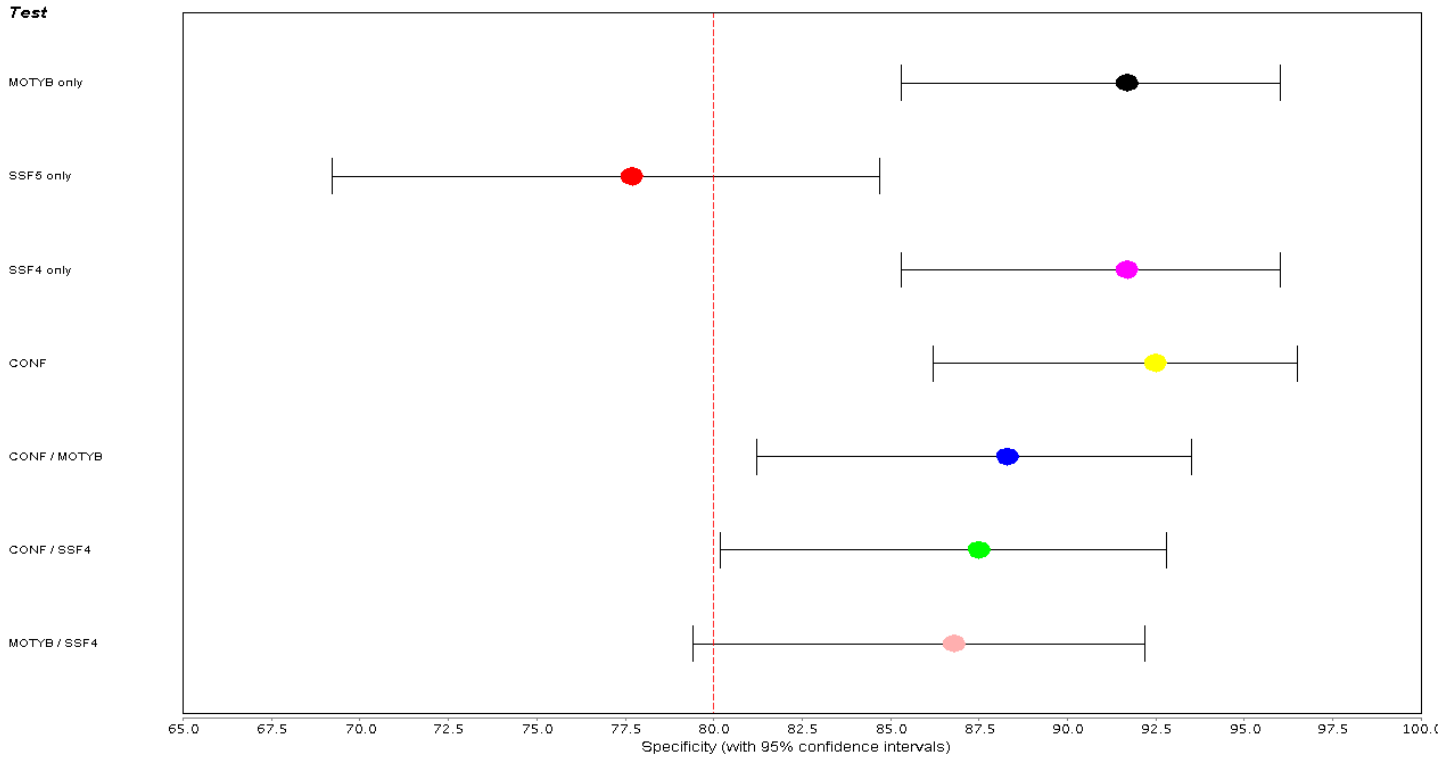

SF3: Performance of simultaneous combinations, scenario a (all patients): i) sensitivity; ii) specificity

i)

All patients, sensitivity of simultaneous (a) combinations, n=265

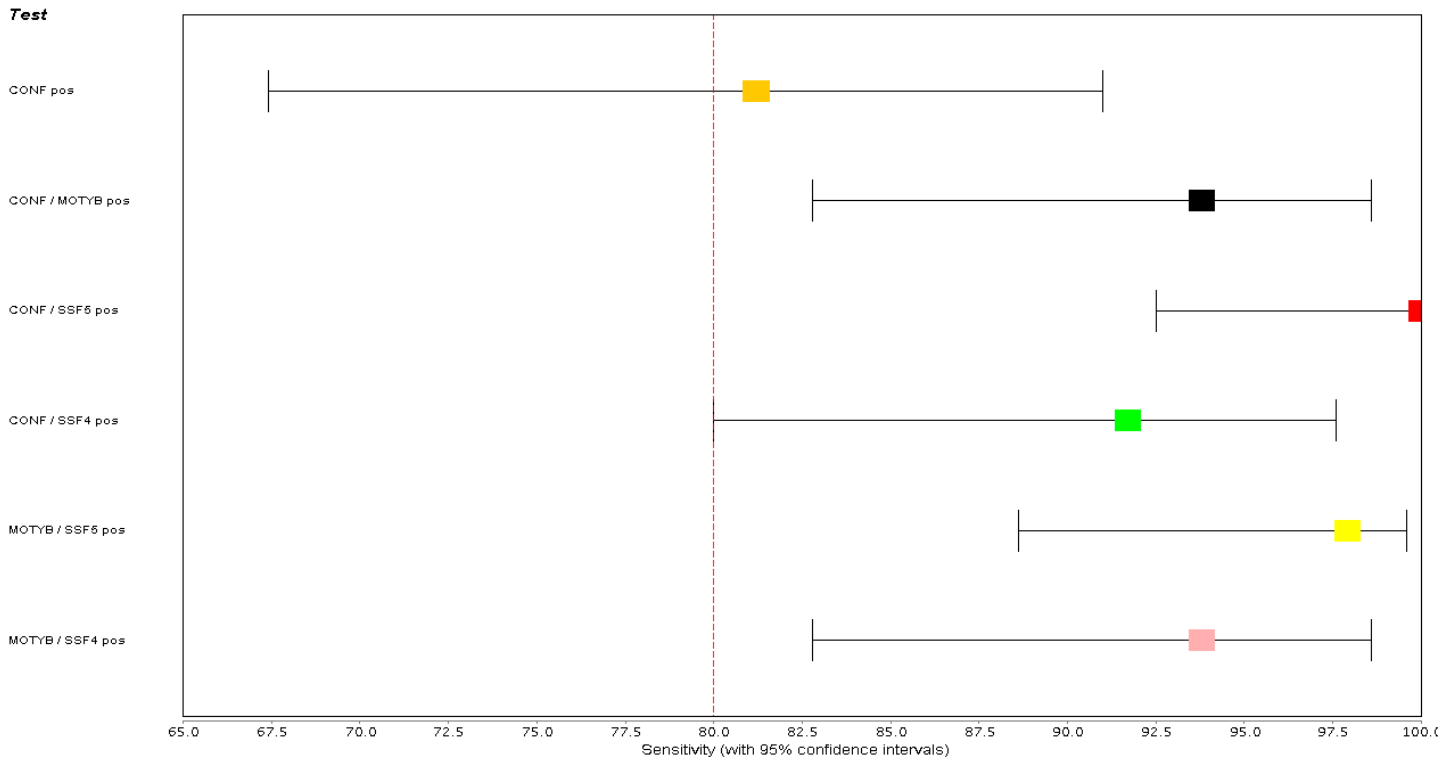

ii)

All patients, specificity of simultaneous (a) combinations, n=265

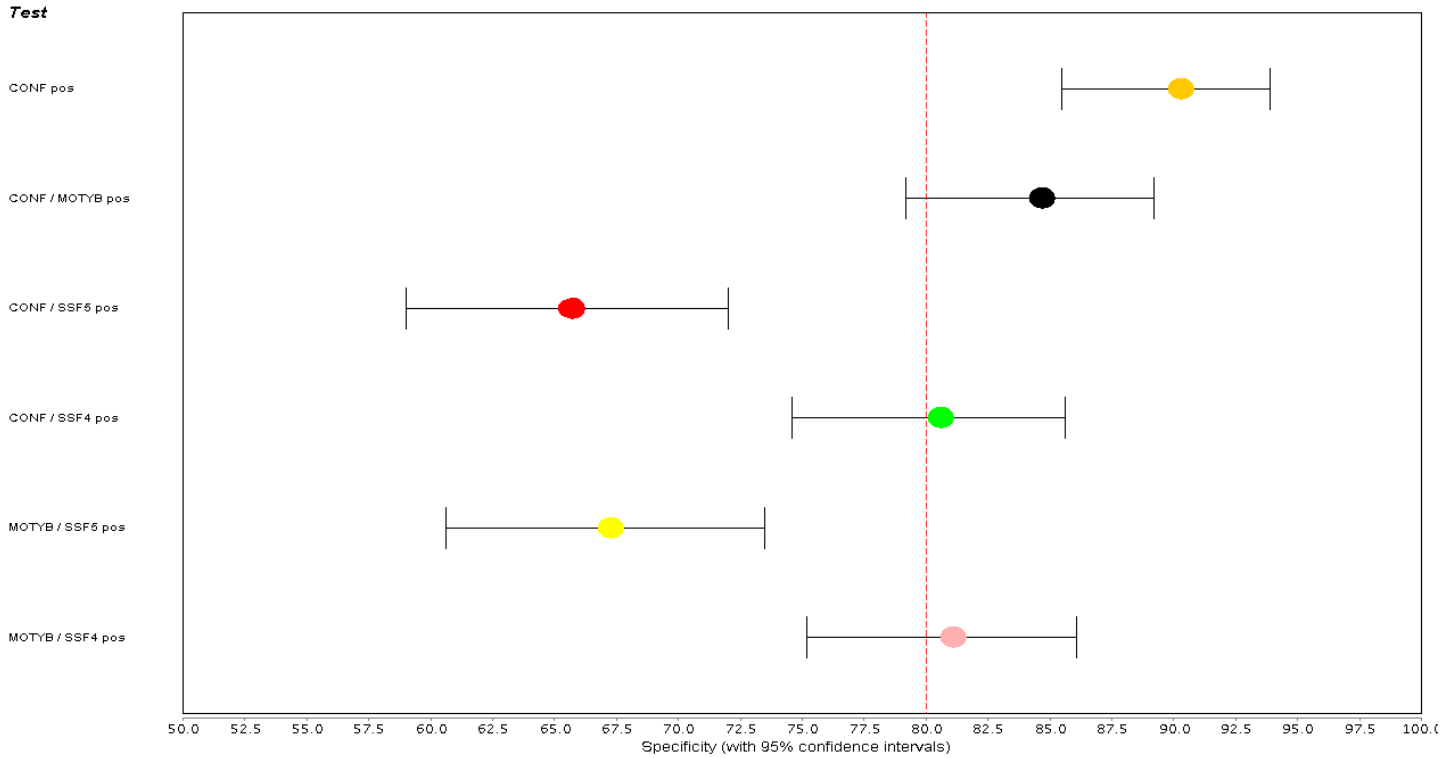

SF4: Performance of simultaneous combinations, scenario b (all patients): i) sensitivity; ii) specificity

i)

All patients, sensitivity of simultaneous (b) combinations, n=265

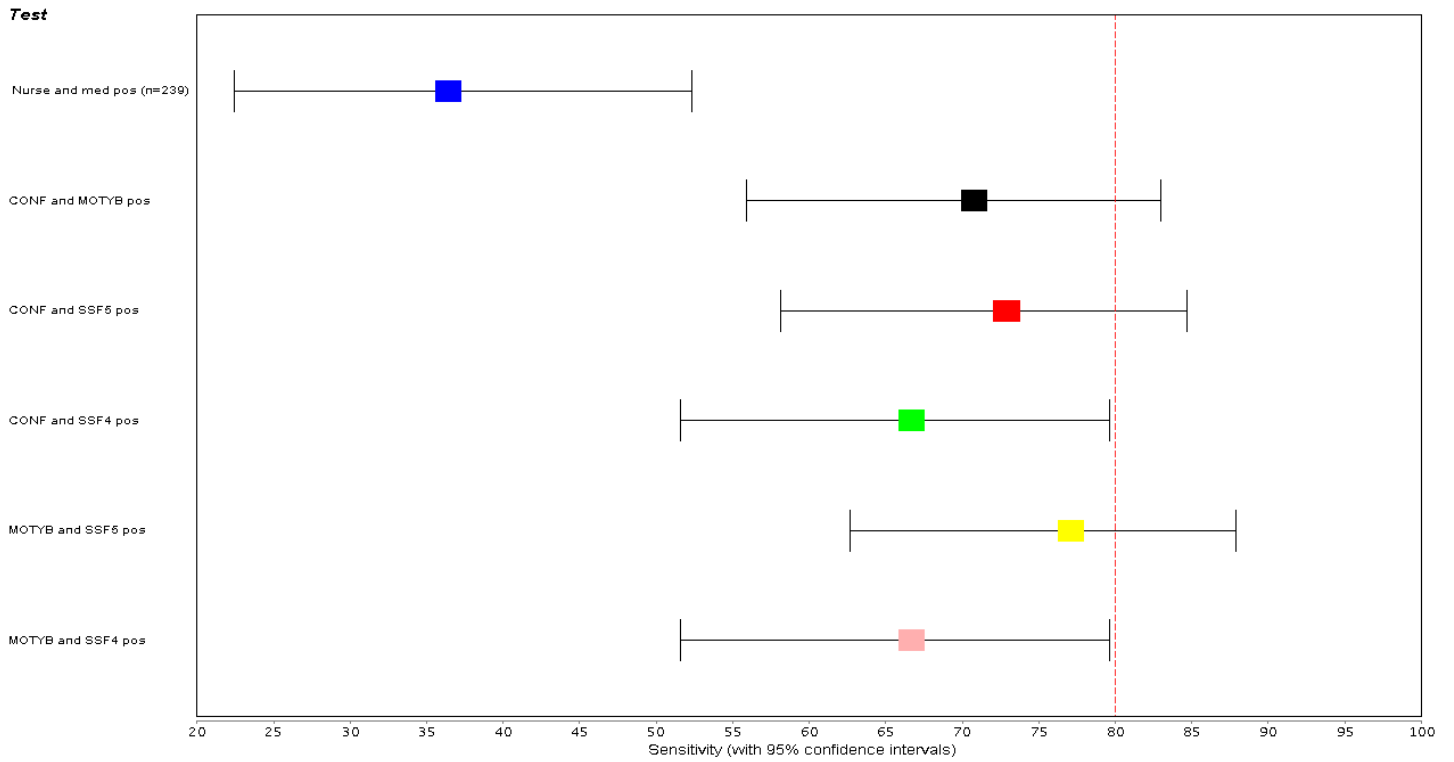

ii)

All patients, specificity of simultaneous (b) combinations, n=265

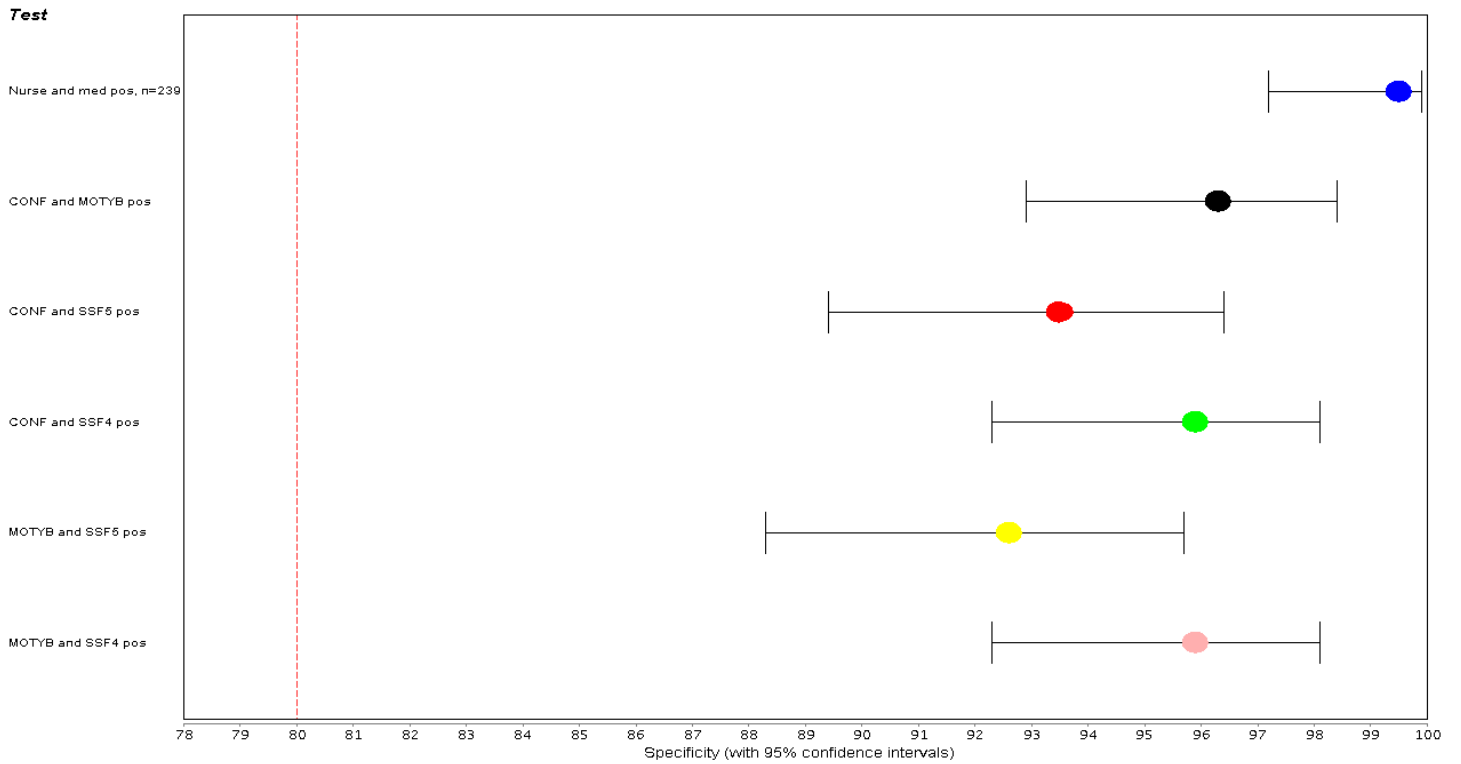

SF5: Performance of sequential combinations (all patients): i) sensitivity; ii) specificity

i)

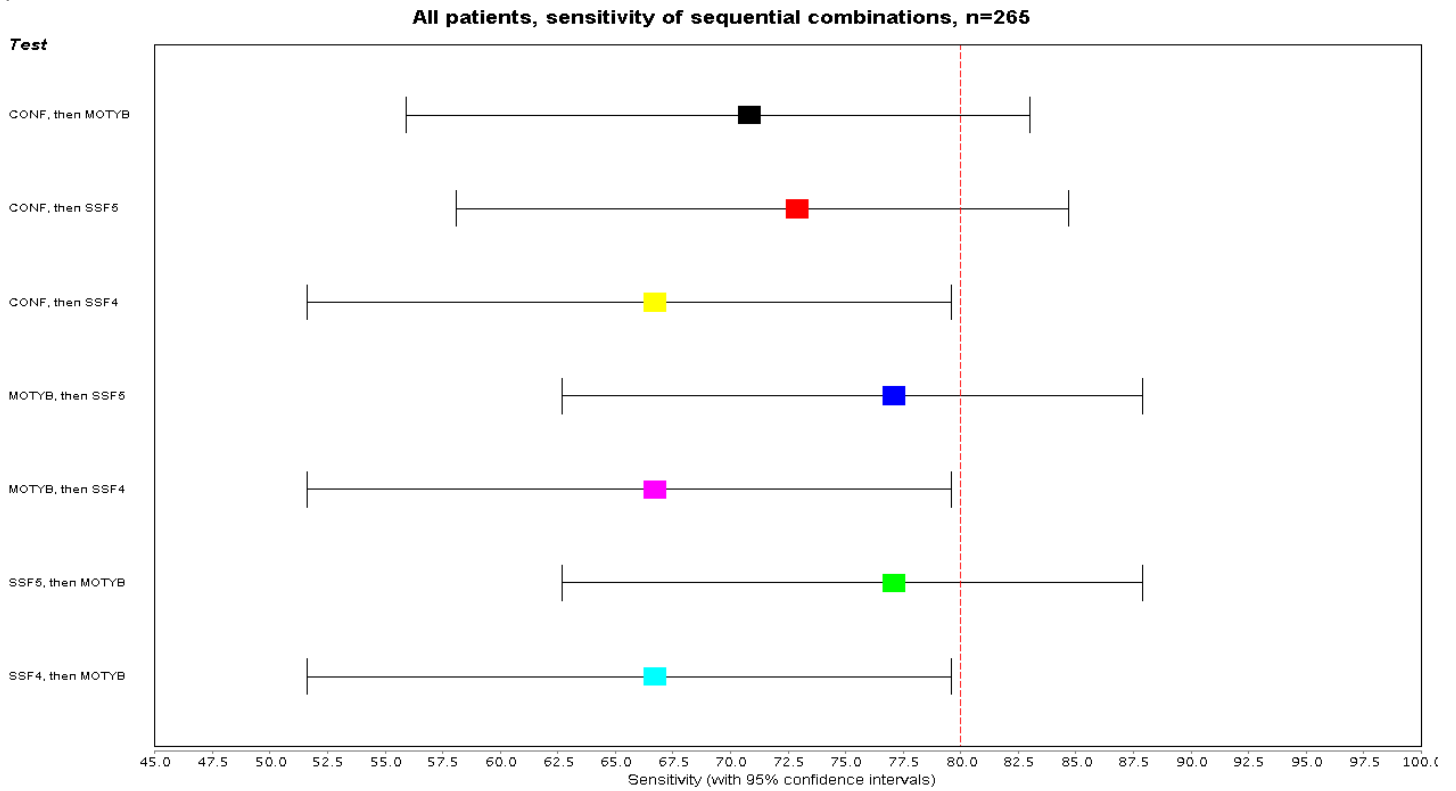

ii)

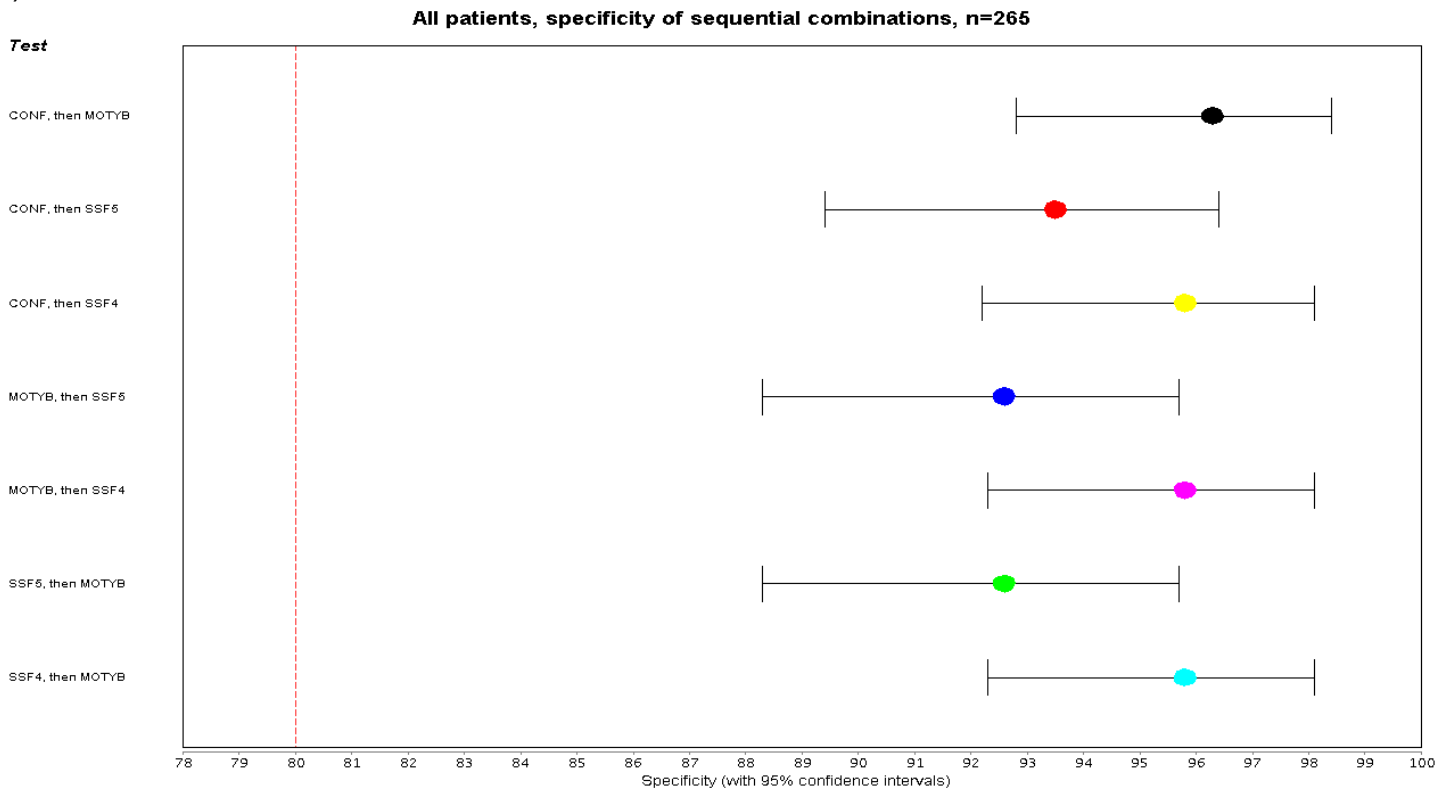

Supplement: jnnp-2013-307053-s4.pdf [file jnnp-2013-307053-s4.pdf]
