# Supplementary material for: Attention! A good bedside test for delirium?
Source: PubMed Central journal article supplement — J Neurol Neurosurg Psychiatry. 2014 Feb 25;85(10):1122–31. doi: 10.1136/jnnp-2013-307053 (PMC4173985; doi:10.1136/jnnp-2013-307053), 2014-02-25
Supplement: jnnp-2013-307053-s2.pdf [file jnnp-2013-307053-s2.pdf]

### **Standardised set of questions used to interview nursing staff**

1. How many days approximately have you been looking after \_\_\_?
2. Do you think he/ she is delirious or acutely confused?
3. Has there been a sudden change in \_\_\_'s mental state since coming into hospital?
  - a. If so, when did you notice this change?
4. Do you think he/she is able to focus well when you're talking to him/her or does he/she tend to ramble off the point?
5. Does he/ she seem better at any period in the day compared to other times?
6. Has \_\_\_'s level of consciousness been altered at all- has he/ she been drowsy or not interacting, or perhaps hyperaware at times?
