# Supplementary figures and images for: Attention! A good bedside test for delirium?
Source: HighWire-hosted journal article supplement (doi:10.1136/jnnp-2013-307053), 2014-02-25

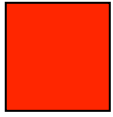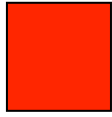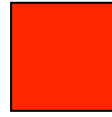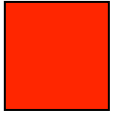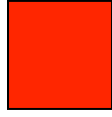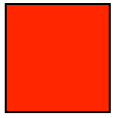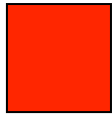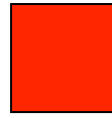

Supplement: jnnp-2013-307053supp_1.pdf [file jnnp-2013-307053supp_1.pdf]
